# Supplementary material for: Enhanced π-frustration in carbo-benzenic chromophores
Source: Royal Society of Chemistry journal article supplement (doi:10.1039/c3cc43204a), 2013-01-01

## Supplementary Information

### Enhanced $\pi$ -frustration in *carbo*-benzenic chromophores

Iaroslav Baglai,<sup>a,b,c</sup> Valérie Maraval,<sup>\*a,b</sup> Christian Bijani,<sup>a,b</sup> Nathalie Saffon-Merceron,<sup>b</sup>  
Zoia Voitenko,<sup>c</sup> Yulian M. Volovenko<sup>c</sup> and Remi Chauvin<sup>\*a,b</sup>

<sup>a</sup> CNRS, LCC (Laboratoire de Chimie de Coordination), 205 route de Narbonne, BP 44099, F-31077 Toulouse Cedex 4, France. E-mail: vmaraval@lcc-toulouse.fr; chauvin@lcc-toulouse.fr; Fax: +33 (0)5 61 55 30 03; Tel: +33 (0)5 61 33 31 13.

<sup>b</sup> Université de Toulouse, UPS, INPT, F-31077 Toulouse, France.

<sup>c</sup> Kiev National Taras Shevchenko University, 60 Volodymyrska St, 01033 Kiev, Ukraine.

#### Experimental section.

**General.** THF and diethyl ether were dried and distilled over sodium/benzophenone, pentane and dichloromethane over P<sub>2</sub>O<sub>5</sub>. All other reagents were used as commercially available. In particular, commercial solutions of *n*-BuLi were 2.5 M in hexane, solutions of ethylmagnesium bromide were 3 M in THF, solutions of HCl were 2 M in diethylether. Previously described procedures were used for the preparation of **2**.<sup>[4]</sup> All reactions were carried out under argon using Schlenk and vacuum line techniques. Column chromatography was carried out on silica gel (60 P, 70-200 mm). Silica gel thin-layer chromatography plates (60F254, 0.25 mm) were revealed by treatment with an ethanolic solution of phosphomolybdic acid (20 %). The following analytical instruments were used. <sup>1</sup>H and <sup>13</sup>C NMR: Bruker DPX 300, Avance 300, Avance 400, Avance 400WB or Avance 500 spectrometers. Mass spectrometry: Quadrupolar Nermag R10-10H spectrometer. Most of the NMR spectra were recorded in CDCl<sub>3</sub> solutions. NMR chemical shifts  $\delta$  are in ppm, with positive values to high frequency relative to the tetramethylsilane reference; coupling constants *J* are in Hz. UV: spectrometer Perkin-Elmer UV-Vis Win-Lab Lambda 35.

**3-bromo-1-methyl-2-phenyl-1H-indole (1).** To a solution of 1-ethyl-2-phenyl-1*H*-indole (1.0 g, 4.52 mmol) in CHCl<sub>3</sub> (50 mL) at 0 °C was added N-bromosuccinimide (0.845 g, 4.75 mmol) over 5 min in small portions. The mixture was stirred at the same temperature for 3 h. After evaporating the solvent, the residue was extracted with dichloromethane and washed with H<sub>2</sub>O. The organic layer was separated and dried over MgSO<sub>4</sub> and the solvent was

removed under reduced pressure. After purification by chromatography over silica gel (acetone:pentane 5:95) pure **1** was isolated in 93 % yield (1.26 g).  $R_f \approx 0.18$ .

$^1\text{H}$  NMR (400 MHz,  $\text{CDCl}_3$ )  $\delta$  7.65 (d,  $J = 7.8$  Hz, 1 H,  $H_9$ -Ind), 7.53 (m, 5 H,  $o$ -, $m$ -, $p$ -Ph), 7.42 (d,  $J = 8.1$  Hz, 1 H,  $H_6$ -Ind), 7.33 (t,  $J = 7.5$  Hz, 1 H,  $H_7$ - or  $H_8$ -Ind), 7.27 (t,  $J = 7.2$  Hz, 1 H,  $H_7$ - or  $H_8$ -Ind), 4.16 (q,  $J = 7.1$  Hz, 2 H,  $\text{CH}_2$ ), 1.27 (t,  $J = 7.1$  Hz, 3 H,  $\text{CH}_3$ ).  $^{13}\text{C}\{^1\text{H}\}$  NMR (101 MHz,  $\text{CDCl}_3$ )  $\delta$  137.6, 135.6 ( $\text{C}_{2-}$ ,  $\text{C}_{5-}$  Ind), 130.8 ( $i$ -Ph), 130.6, 128.5( $m$ -, $o$ -Ph), 128.8 ( $p$ -Ph), 127.4 ( $\text{C}_4$ -Ind), 122.7, 120.5, 119.5 ( $\text{C}_{7-}$ ,  $\text{C}_{8-}$ ,  $\text{C}_9$ -Ind), 109.9 ( $\text{C}_6$ -Ind), 90.5 ( $\text{C}_3$ -Ind-Br), 39.5 ( $\text{CH}_2$ ), 15.4 ( $\text{CH}_3$ ). HRMS (DCI/ $\text{CH}_4$ ):  $m/z$  calcd for  $\text{C}_{16}\text{H}_{14}\text{NBr}$ : 299.0310, found: 299.0320. M.p: 56 °C.

**1-methyl-3-[10-(1-methyl-2-phenyl-1H-indol-3-yl)-4,7,13,16-tetraphenylcyclooctadeca-1,2,3,7,8,9,13,14,15-nonaen-5,11,17-triyn-1-yl]-2-phenyl-1H-indole (4)**. To a solution of 3-bromo-1-ethyl-2-phenyl-1H-indole **1** (168 mg, 0.56 mmol) in THF (15 mL) under stirring at -78 °C was added  $n$ -BuLi (192  $\mu\text{l}$ , 0.48 mmol). The reaction mixture was stirred during 1 hour at -78 °C before adding a solution of the [6]pericyclynedione **2** (136 mg, 0.2 mmol) in THF (3 mL). The temperature was allowed to increase slowly up to -20 °C over 3 h. After treatment with saturated aqueous  $\text{NH}_4\text{Cl}$ , the aqueous layer was extracted with diethylether. The combined organic layers were washed with brine, dried over  $\text{MgSO}_4$  and evaporated under reduced pressure. The obtained poorly stable [6]pericyclynediol **3** was directly used in the reduction step without further purification. The mixture was thus dissolved in DCM, before adding  $\text{SnCl}_2$  (400 mg, 2.1 mmol) followed by a solution of HCl in diethylether (2.1 ml, 4.2 mmol) at -78 °C. The reaction mixture was allowed to warm up to room temperature slowly, and the stirring was maintained for 30 min. before treatment with aqueous 1 M NaOH (4.4 mL, 4.4 mmol). After addition of brine, the aqueous layer was extracted with DCM. The combined organic layers were dried over  $\text{MgSO}_4$  and concentrated under reduced pressure. The residue was purified by chromatography over silica gel (DCM:pentane 3:7) to give **4** as a green-gold solid in 3 % overall yield over two steps (6 mg).

$^1\text{H}$  NMR (500 MHz,  $\text{CD}_2\text{Cl}_2$ )  $\delta$  9.44 (d,  $J = 7.7$  Hz, 2 H,  $H_9$ -Ind), 9.16 (d,  $J = 7.7$  Hz, 8 H,  $o$ -Ph- $\text{C}_{18}$ ), 7.85 (m, 2 H,  $H_6$ -Ind), 7.83 (t,  $J = 7.7$  Hz, 8 H,  $m$ -Ph- $\text{C}_{18}$ ), 7.73 (d,  $J = 7.0$  Hz, 2 H,  $o$ -Ph-Ind), 7.65 (m, 6 H,  $p$ -Ph- $\text{C}_{18}$ ,  $H_7$ -Ind), 7.56 (t,  $J = 7.4$  Hz, 2 H,  $H_8$ -Ind), 7.16 (m, 2 H,  $p$ -Ph-Ind), 7.10 (m, 4 H,  $m$ -Ph-Ind), 4.58 (q,  $J = 6.8$  Hz, 4 H,  $\text{CH}_2$ ), 1.63 (t,  $J = 6.8$  Hz, 6 H,  $\text{CH}_3$ ).  $^{13}\text{C}\{^1\text{H}\}$  NMR (126 MHz,  $\text{CD}_2\text{Cl}_2$ )  $\delta$  142.0 ( $\text{C}_2$ -Ind), 140.1 ( $i$ -Ph- $\text{C}_{18}$ ), 139.8 ( $\text{C}_4$ -Ind), 137.5 ( $\text{C}_5$ -Ind), 131.9 ( $o$ -Ph-Ind), 130.7 ( $i$ -Ph-Ind), 130.0 ( $o$ -Ph- $\text{C}_{18}$ ), 129.4 ( $m$ -Ph- $\text{C}_{18}$ ), 129.1 ( $p$ -Ph- $\text{C}_{18}$ ), 128.9 ( $m$ -Ph-Ind), 128.5 ( $p$ -Ph-Ind), 123.7 ( $\text{C}_7$ -Ind), 121.9 ( $\text{C}_8$ -Ind), 120.2 ( $\text{C}_9$ -

Ind), 116.0 ( $C_3$ -Ind), 120.2, 117.26, 115.7, ( $C-C\equiv C-C$ ,  $C=C=C=C$ ), 110.6 ( $C_6$ -Ind), 102.5( $C(C_{18})$ -Ph), 99.0 ( $C(C_{18})$ -Ind), 39.6 ( $CH_2$ ), 15.3 ( $CH_3$ ). MS (MALDI-TOF/DCTB):  $m/z$  = 964.3  $[M]^+$ . HRMS (MALDI-TOF/DCTB):  $m/z$  calcd for  $C_{74}H_{48}N_2$ : 964.3817, found: 964.3875. UV-vis ( $CHCl_3$ ):  $\lambda_{max}$  = 503 nm ( $\epsilon$  = 40778  $L\cdot mol^{-1}\cdot cm^{-1}$ ), 242 nm. M.p. 264 °C.

**1-ethyl-3-ethynyl-2-phenyl-1H-indole (5):** three-step synthesis.

**1) 1-ethyl-3-iodo-2-phenyl-1H-indole.**

To a solution of 1-ethyl-2-phenyl-1H-indole (0.5 g, 2.26 mmol) in  $CHCl_3$  (30 mL) at 0 °C was added N-iodosuccinimide (0.535 g, 2.37 mmol) over 5 min in small portions. The mixture was stirred at the same temperature for 3 h. After evaporation of the solvent, the residue was extracted with dichloromethane and washed with  $H_2O$ . The organic layer was separated and dried over  $MgSO_4$ . The solvent was removed under reduced pressure. After purification by chromatography over silica gel (acetone:pentane 2:98), pure 1-ethyl-3-iodo-2-phenyl-1H-indole was isolated in 92 % yield (0.72 g).

$^1H$  NMR ( $CDCl_3$ )  $\delta$  7.59 - 7.44 (m, 6 H,  $H_9$ -Ind,  $o$ -, $m$ -, $p$ -Ph), 7.39 - 7.22 (m, 3 H,  $H_6$ -,  $H_7$ -,  $H_8$ -Ind), 4.16 (q,  $J$  = 7.1 Hz, 2 H,  $CH_2$ ), 1.26 (t,  $J$  = 7.2 Hz, 3 H,  $CH_3$ ).  $^{13}C\{^1H\}$  NMR (101 MHz,  $CDCl_3$ )  $\delta$  141.4 ( $C_2$ -Ind), 136.5 ( $C_5$ -Ind), 132.0 ( $i$ -Ph), 130.8 ( $m$ -Ph), 130.6 ( $C_4$ -Ind), 128.9 ( $p$ -Ph), 128.5 ( $o$ -Ph), 122.8, 121.6, 120.6, ( $C_7$ -,  $C_8$ -,  $C_9$ -Ind), 110.0 ( $C_6$ -Ind), 59.5 ( $C_3$ -Ind-I), 39.9 ( $CH_2$ ), 15.5 ( $CH_3$ ). HRMS (DCI/ $CH_4$ ):  $m/z$  calcd for  $C_{16}H_{14}NI$ : 347.0171, found: 347.0165. M.p. 93 °C.

**2) 1-ethyl-2-phenyl-3-[2-(trimethylsilyl)ethynyl]-1H-indole**

$CuI$  (42 mg, 0.21 mmol) and  $Pd(PPh_3)_2Cl_2$  (60 mg, 0.09 mmol) were added to 1-ethyl-3-iodo-2-phenyl-1H-indole (1.04 g, 3.0 mmol) under Argon. Then, freshly distilled diisopropylamine (15 mL) was added and the mixture was stirred for 20 min before adding  $Me_3SiC\equiv CH$  (1.0 ml, 6.52 mmol) and stirring the suspension for 60 h at room temperature before. Then, diethylether (20 mL) was added and the mixture was filtrated through Celite. The filtrate was evaporated and the residue was dissolved in  $Et_2O$ , washed with 10 % aqueous  $HCl$ , water, and  $NaHCO_3$ . The resulting organic solution was dried over anhydrous  $MgSO_4$ . The solvent was removed under reduced pressure and the brown residue was purified by chromatography over silica gel (ether:pentane 1:99) to give 1-ethyl-2-phenyl-3-[2-(trimethylsilyl)ethynyl]-1H-indole in 56 % yield (0.53 g).

$^1H$  NMR (400 MHz,  $CDCl_3$ )  $\delta$  7.92 (d,  $J$  = 7.4 Hz, 1 H,  $H_9$ -Ind), 7.72 (d,  $J$  = 7.9 Hz, 2 H,  $o$ -Ph), 7.61- 7.33 (m, 6 H,  $H_6$ -,  $H_7$ -,  $H_8$ -Ind,  $m$ -, $p$ -Ph), 4.26 (q,  $J$  = 7.1 Hz, 2 H,  $CH_2$ ), 1.38 (t,  $J$

= 7.1 Hz, 3 H,  $CH_3$ ), 0.34. (s, 9 H, TMS).  $^{13}C\{^1H\}$  NMR (101 MHz,  $CDCl_3$ )  $\delta$  144.3 ( $C_2$ -Ind), 135.9 ( $C_5$ -Ind), 131.1 (*i*-Ph), 130.2 (*m*-Ph), 129.4 ( $C_4$ -Ind), 128.6 (*p*-Ph), 128.4 (*o*-Ph), 122.9, 120.9, 120.3 ( $C_7$ -,  $C_8$ -,  $C_9$ -Ind), 110.2 ( $C_6$ -Ind), 100.0, 97.4, 96.4 ( $C_3$ -Ind,  $-C\equiv C-$ ), 39.3 ( $CH_2$ ), 15.3 ( $CH_3$ ), 0.43 ( $Si(CH_3)_3$ ). HRMS (DCI/ $CH_4$ ):  $m/z$  calcd for  $C_{21}H_{23}NSi$ : 317.1600, found: 317.1614. M.p. 86 °C.

### 3) 1-ethyl-3-ethynyl-2-phenyl-1*H*-indole (5)

$K_2CO_3$  (0.3 g, 2.16 mmol) was added to a solution of 1-ethyl-2-phenyl-3-[2-(trimethylsilyl)ethynyl]-1*H*-indole (0.23 g, 0.72 mmol) in methanol (20 mL) at room temperature. The resulting suspension was stirred 24 h, then saturated  $NH_4Cl$  (10 mL) was added and the mixture was concentrated under reduced pressure to remove methanol. After addition of diethyl ether (30 mL), the organic layer was washed with saturated  $NH_4Cl$ , brine, dried over  $MgSO_4$  and concentrated to give pure **5** in 90 % yield (0.16 g).

$^1H$  NMR (400 MHz,  $CDCl_3$ )  $\delta$  7.88 (d,  $J = 7.7$  Hz, 1 H,  $H_9$ -Ind), 7.66 (d,  $J = 8.0$  Hz, 2 H, *o*-Ph), 7.61-7.46 (m, 4 H, *m*-,*p*-Ph,  $H_6$ -Ind), 7.35 (dt,  $J = 20.3, 7.2$  Hz, 2 H,  $H_7$ -,  $H_8$ -Ind), 4.22 (q,  $J = 7.1$  Hz, 2 H,  $CH_2$ ), 3.20 (s, 1 H,  $C\equiv C-H$ ), 1.36 (t,  $J = 7.2$  Hz, 3 H,  $CH_3$ ).  $^{13}C\{^1H\}$  NMR (101 MHz,  $CDCl_3$ )  $\delta$  144.4 ( $C_2$ -Ind), 135.7 ( $C_5$ -Ind), 131.0 (*i*-Ph), 130.1 (*m*-Ph), 129.5 ( $C_4$ -Ind), 128.8 (*p*-Ph), 128.6 (*o*-Ph), 122.9, 120.9, 120.1, ( $C_7$ -,  $C_8$ -,  $C_9$ - Ind), 110.2 ( $C_6$ -Ind), 96.6 ( $C_3$ -Ind), 79.3 ( $\equiv C-H$ ), 78.3 ( $\equiv C$ -Ind), 39.2 ( $CH_2$ ), 15.3 ( $CH_3$ ). HRMS (DCI/ $CH_4$ ):  $m/z$  calcd for  $C_{18}H_{15}N$ : 245.1204, found: 245.1210. M.p. 79 °C.

### 1,10-bis[2-(1-ethyl-2-phenyl-1*H*-indol-3-yl)ethynyl]-4,7,13,16-tetramethoxy-4,7,13,16-tetraphenylcyclooctadeca-2,5,8,11,14,17-hexayne-1,10-diol (6).

*n*-BuLi (0.68 mL, 1.7 mmol) was added to a solution of HMDS (0.38 mL, 1.8 mmol) in THF (20 mL) under stirring at -78 °C. The mixture was stirred during 30 minutes at -78 °C before adding a solution of **5** (210 mg, 0.86 mmol) in THF (3 mL). The reaction mixture was stirred during 30 minutes at -78 °C before adding of [6]pericyclynedione **2** (194 mg, 0.29 mmol) in THF (5 mL). The temperature was slowly increased up to -45 °C over 1 hour before adding saturated aqueous  $NH_4Cl$ . The aqueous layer was extracted with diethylether and the combined organic layers were washed with brine, dried over  $MgSO_4$  and evaporated under reduced pressure. The residue was purified by chromatography over silica gel (EtOAc:pentane 4:6) to give the [6]pericyclynediol **6** as a light solid in 61 % yield (210 mg).

$^1H$  NMR (400 MHz,  $CDCl_3$ )  $\delta$  7.83-7.20 (m, 38 H, *Har*), 4.26-4.18 (m, 4 H,  $CH_2$ ), 3.73-3.28 (m, 14 H,  $CH_3-O$ , *OH*), 1.41-1.28 (m, 6 H,  $CH_3-CH_2$ ).  $^{13}C\{^1H\}$  NMR (101 MHz,  $CDCl_3$ )  $\delta$

145.0 (*C*<sub>2</sub>-Ind), 139.6 (*i*-Ph-*C*<sub>18</sub>), 135.9 (*C*<sub>5</sub>-Ind), 130.4 (*i*-Ph-Ind), 129.7, 129.2, 129.0, 128.8 (*o*-,*m*-,*p*-Ph-Ind), 128.5 (*m*-,*p*-Ph-*C*<sub>18</sub>), 126.6 (*o*-Ph-*C*<sub>18</sub>), 123.0, 121.1, 120.0 (*C*<sub>7</sub>-, *C*<sub>8</sub>-, *C*<sub>9</sub>-Ind), 110.3 (*C*<sub>6</sub>-Ind), 95.0 (*C*<sub>3</sub>-Ind), 88.0, 85.2, 85.0, 84.4, 79.5 (-*C*≡*C*-), 71.9 (*C*-OMe), 55.0 (*C*-OH), 53.5 (O-*CH*<sub>3</sub>), 39.3 (*CH*<sub>2</sub>Me), 30.35, 15.27 (*CH*<sub>3</sub>). HRMS (MALDI-TOF/DCTB): *m/z* calcd for C<sub>82</sub>H<sub>62</sub>N<sub>2</sub>O<sub>6</sub>Na [MNa]<sup>+</sup>: 1193.4506, found: 1193.4419. M.p. 123 °C.

**3-(1-chloro-2-{10-[2-chloro-2-(1-ethyl-2-phenyl-1*H*-indol-3-yl)ethenyl]-4,7,13,16-tetraphenylcyclooctadeca-1,2,3,7,8,9,13,14,15-nonaen-5,11,17-triyn-1-yl}ethenyl)-1-ethyl-2-phenyl-1*H*-indole (8)**

To a solution of **6** (110 mg, 0.1 mmol) in dry dichloromethane (30 mL) at -78 °C were added SnCl<sub>2</sub> (190 mg, 1.0 mmol) and then HCl·Et<sub>2</sub>O (1.0 mL, 2.0 mmol). The temperature of the reaction mixture was slowly increased up to -10 °C in 3 hours. Then aqueous 1 M NaOH (2.2 mL, 2.2 mmol) was added. The aqueous layer was extracted with DCM and the combined organic layers were washed with brine, dried over MgSO<sub>4</sub> and evaporated under reduced pressure. The residue was purified by chromatography over silica gel (DCM:pentane 3:7) to give the three *carbo*-benzenic products **8**, **9** and **10** in 7 % global yield (based on **8**).

<sup>1</sup>H NMR (500 MHz, CD<sub>2</sub>Cl<sub>2</sub>) δ 9.41 (d, *J* = 7.2 Hz, 8 H, *o*-Ph-*C*<sub>18</sub>), 8.47 (d, *J* = 6.9 Hz, 2 H, *H*<sub>9</sub>-Ind), 8.39 (s, 2 H, (*HC*=*C*-Cl), 7.97-7.92 (m, 8 H, *m*-Ph-*C*<sub>18</sub>), 7.89 (d, *J* = 7.0 Hz, 4 H, *o*-Ph-Ind), 7.75-7.70 (m, 4 H, *p*-Ph-*C*<sub>18</sub>), 7.68 (d, *J* = 7.4 Hz, 2 H, *H*<sub>6</sub>-Ind), 7.64-7.59 (m, 4 H, *m*-Ph-Ind), 7.52-7.48 (m, 6 H, *H*<sub>7</sub>-, *H*<sub>8</sub>-Ind, *p*-Ph-Ind), 4.36 (q, *J* = 7.0 Hz, 4 H, *CH*<sub>2</sub>), 1.49 (t, *J* = 7.2 Hz, 6 H, *CH*<sub>3</sub>). <sup>13</sup>C{<sup>1</sup>H} NMR (126 MHz, CD<sub>2</sub>Cl<sub>2</sub>) δ 141.2 (*C*<sub>2</sub>-Ind), 140.2 (*i*-Ph-*C*<sub>18</sub>), 136.4 (*C*<sub>4</sub>-Ind), 136.2 (*C*<sub>5</sub>-Ind), 131.8 (*HC*=*C*-Cl) 131.6 (*i*-Ph-Ind), 130.9 (*o*-Ph-Ind) 130.6 (*p*-Ph-Ind), 130.0 (*o*-Ph-*C*<sub>18</sub>), 129.8 (*m*-Ph-*C*<sub>18</sub>), 129.6 (*p*-Ph-*C*<sub>18</sub>), 129.1 (*m*-Ph-Ind), 128.1 (*HC*=*C*-Cl), 122.9 (*C*<sub>7</sub>-Ind), 121.3 (*C*<sub>8</sub>-Ind), 120.6 (*C*<sub>9</sub>-Ind), 120.0, 119.5, 118.7 (*C*-*C*≡*C*-*C*, *C*=*C*=*C*=*C*), 114.5 (*C*<sub>3</sub>-Ind), 110.6 (*C*<sub>6</sub>-Ind), 104.0 (*C*(*C*<sub>18</sub>)-Ph), 100.05 (*C*(*C*<sub>18</sub>)-*CH*=), 39.2 (*CH*<sub>2</sub>), 15.2 (*CH*<sub>3</sub>). UV-vis (CHCl<sub>3</sub>): λ<sub>max</sub> = 243, 514 nm. MS (MALDI-TOF/DCTB): *m/z*: 1084.4 [M]<sup>+</sup>.

**2-{10-[2-chloro-2-(1-ethyl-2-phenyl-1H-indol-3-yl)ethenyl]-4,7,13,16-tetraphenylcyclooctadeca-1,2,3,7,8,9,13,14,15-nonaen-5,11,17-trien-1-yl}-1-(1-ethyl-2-phenyl-1H-indol-3-yl)ethan-1-one (9)**

Isolated upon purification of **8** by chromatography over silica gel).

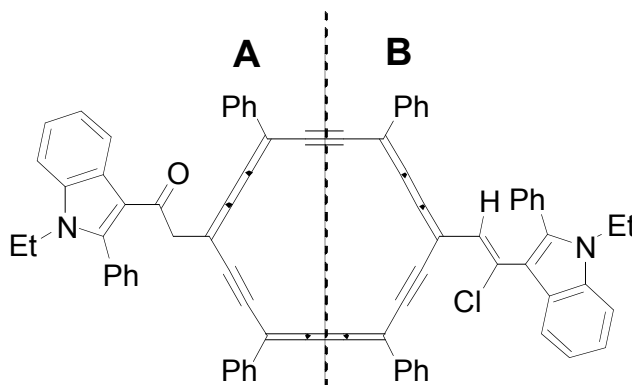

$^1\text{H}$  NMR (500 MHz,  $\text{CD}_2\text{Cl}_2$ )  $\delta$  9.48 (d,  $J = 7.8$  Hz, 4 H, *o*-Ph- $\text{C}_{18}\text{B}$ ), 9.32 (d,  $J = 7.8$  Hz, 4 H, *o*-Ph- $\text{C}_{18}\text{A}$ ), 9.15 (m, 1 H,  $H_9$ -IndA), 8.48 (m, 2 H,  $H_9$ -IndB,  $\text{HC}=\text{C}-\text{Cl}$ ), 7.97 (m, 4 H, *m*-Ph- $\text{C}_{18}\text{B}$ ), 7.96 (m, 2 H, *p*-Ph- $\text{C}_{18}\text{A}$ ), 7.90 (m, 4 H, *m*-Ph- $\text{C}_{18}\text{A}$ ), 7.89 (m, 2 H, *o*-Ph-IndB), 7.73 (m, 2 H, *p*-Ph- $\text{C}_{18}\text{B}$ ), 7.68 (m, 1 H,  $H_6$ -IndB), 7.63 (m, 2 H, *m*-Ph-IndB), 7.58 (m, 1 H,  $H_6$ -IndA), 7.57 (m, 1 H,  $H_8$ -IndA), 7.52 (m, 2 H,  $H_7$ -IndA,  $H_7$ -IndB), 7.50 (m, 1 H, *p*-Ph-IndB), 7.49 (m, 1 H,  $H_8$ -IndB), 7.32 (m, 2 H, *o*-Ph-IndA), 7.22 (m, 1 H, *p*-Ph-IndA), 7.13 (m, 2 H, *m*-Ph-IndA), 5.44 (s, 2 H,  $\text{CH}_2-\text{C}=\text{O}$ ), 4.36 (q,  $J = 6.8$  Hz, 2 H,  $\text{CH}_2-\text{NB}$ ), 3.93 (q,  $J = 7.2$  Hz, 2 H,  $\text{CH}_2-\text{NA}$ ), 1.50 (t,  $J = 7.1$  Hz, 3 H,  $\text{CH}_3\text{B}$ ), 1.13 (t,  $J = 7.3$  Hz, 3 H,  $\text{CH}_3\text{A}$ ).  $^{13}\text{C}$   $\{^1\text{H}\}$  NMR (126 MHz,  $\text{CD}_2\text{Cl}_2$ )  $\delta$  191.6 ( $\text{C}=\text{O}$ ), 147.3,  $\text{C}_2$ -IndA), 141.2 ( $\text{C}_2$ -IndB), 140.5 (*i*-Ph- $\text{C}_{18}\text{B}$ ), 140.2 (*i*-Ph- $\text{C}_{18}\text{A}$ ), 136.3 ( $\text{C}_5$ -IndB), 136.2 ( $\text{C}_4$ -IndA), 135.9 ( $\text{C}_5$ -IndA), 135.0 ( $\text{C}_4$ -IndB), 131.6 (*i*-Ph-IndA, *i*-Ph-IndB), 130.8 (*o*-Ph-IndB), 130.5 (*p*-Ph-IndB), 130.4 (*p*-Ph-IndA), 130.2 (*o*-Ph-IndA), 130.1 ( $=\text{C}-\text{Cl}$ ), 130.0 (*o*-Ph- $\text{C}_{18}\text{A}$ ), 129.9 (*o*-Ph- $\text{C}_{18}\text{B}$ ), 129.7 (*m*-Ph- $\text{C}_{18}\text{B}$ ), 129.6 (*m*-*p*-Ph- $\text{C}_{18}\text{A}$ ), 129.4 (*p*-Ph- $\text{C}_{18}\text{B}$ ), 129.1 (*m*-Ph-IndB), 129.0 ( $\text{C}=\text{C}-\text{Cl}$ ), 128.8 (*m*-Ph-IndA), 123.6 ( $\text{C}_7$ -IndA), 123.5 ( $\text{C}_9$ -IndA), 123.2 ( $\text{C}_8$ -IndA), 123.0 ( $\text{C}_7$ -IndB), 122.1 ( $\text{C}_3$ -IndA), 121.3 ( $\text{C}_8$ -IndB), 120.6 ( $\text{C}_9$ -IndB), 120.2, 119.0, 118.9, 117.6, 117.3, 117.0 ( $\text{C}-\text{C}\equiv\text{C}-\text{C}$ ,  $\text{C}=\text{C}=\text{C}=\text{C}$ ), 114.5 ( $\text{C}_3$ -IndB), 110.5 ( $\text{C}_6$ -IndB), 110.3 ( $\text{C}_6$ -IndA), 104.0 ( $\text{C}(\text{C}_{18}\text{A})-\text{Ph}$ ,  $\text{C}(\text{C}_{18}\text{B})-\text{Ph}$ ), 100.7 ( $\text{C}(\text{C}_{18})-\text{CH}_2$ ), 100.0 ( $\text{C}(\text{C}_{18})-\text{CH}=\text{C}$ ), 51.2 ( $\text{CH}_2-\text{CO}$ ), 39.3 ( $\text{CH}_2-\text{N}(\text{B})$ ), 39.1 ( $\text{CH}_2-\text{N}(\text{A})$ ), 15.2 ( $\text{CH}_3(\text{B})$ ), 15.0 ( $\text{CH}_3(\text{A})$ ). UV-vis ( $\text{CHCl}_3$ ):  $\lambda_{\text{max}} = 242, 482$  nm. MS (MALDI-TOF/DCTB):  $m/z$ : 1066.3 [ $\text{M}$ ] $^+$ .

**1-(1-ethyl-2-phenyl-1H-indol-3-yl)-2-{10-[2-(1-ethyl-2-phenyl-1H-indol-3-yl)-2-oxoethyl]-4,7,13,16-tetraphenylcyclooctadeca-1,2,3,7,8,9,13,14,15-nonaen-5,11,17-triyn-1-yl}ethan-1-one (10).**

Isolated upon purification of **8** by chromatography over silica gel.

$^1\text{H}$  NMR (500 MHz,  $\text{CD}_2\text{Cl}_2$ )  $\delta$  9.38 (d,  $J = 7.2$  Hz, 8 H, *o*-Ph- $\text{C}_{18}$ ), 9.15 (d,  $J = 6.9$  Hz, 2 H,  $H_9$ -Ind), 7.91 (m, 8 H, *m*-Ph- $\text{C}_{18}$ ), 7.71 (m, 4 H, *p*-Ph- $\text{C}_{18}$ ), 7.58 (m, 2 H,  $H_8$ -Ind), 7.54 (m, 2 H,  $H_6$ -Ind), 7.52 (m, 2 H,  $H_7$ -Ind), 7.32 (m, 4 H, *o*-Ph-Ind), 7.21 (m, 2 H, *p*-Ph-Ind), 7.10 (m, 4 H, *m*-Ph-Ind), 5.56 (s, 4H,  $\text{CH}_2\text{-CO}$ ), 3.93 (m, 4 H,  $\text{CH}_2\text{-N}$ ), 1.19 (t,  $J = 7.2$  Hz, 6 H,  $\text{CH}_3$ ).  $^{13}\text{C}\{^1\text{H}\}$  NMR (126 MHz,  $\text{CDCl}_2$ )  $\delta$  191.6 ( $\text{C=O}$ ), 147.2 ( $\text{C}_2$ -Ind), 139.5 (*i*-Ph- $\text{C}_{18}$ ), 136.1 ( $\text{C}_4$ -Ind), 136.0 ( $\text{C}_5$ -Ind), 130.3 (*i*-Ph-Ind), 130.2 (*o*-Ph-Ind), 130.1 (*p*-Ph-Ind), 130.0 (*o*-Ph- $\text{C}_{18}$ ), 129.7 (*m*-Ph- $\text{C}_{18}$ ), 129.5 (*p*-Ph- $\text{C}_{18}$ ), 128.8 (*m*-Ph-Ind), 123.7 ( $\text{C}_7$ -Ind), 123.3 ( $\text{C}_8$ -Ind), 123.2 ( $\text{C}_9$ -Ind), 122.0 ( $\text{C}_3$ -Ind), 119.2, 118.4, 115.8 ( $\text{C-C}\equiv\text{C-C}$ ,  $\text{C=C=C=C}$ ), 110.2 ( $\text{C}_6$ -Ind), 103.7 ( $\text{C}(\text{C}_{18})\text{-Ph}$ ), 100.5 ( $\text{C}(\text{C}_{18})\text{-CH}_2$ ), 51.3 ( $\text{CH}_2\text{-CO}$ ), 39.1 ( $\text{CH}_2\text{-N}$ ), 14.9 ( $\text{CH}_3$ ). UV-vis ( $\text{CHCl}_3$ ):  $\lambda_{\text{max}} = 241, 451$  nm. MS (MALDI-TOF/DCTB):  $m/z$ : 1048.3  $[\text{M}]^+$ .

### Crystallographic data

The data of the structures for compounds **4** and **8** were collected on a Bruker-AXS Quazar APEX II diffractometer using a 30 W air-cooled microfocus source (ImS) with focusing multilayer optics at a temperature of 193(2)K, with  $\text{MoK}\alpha$  radiation (wavelength = 0.71073 Å) by using phi- and omega-scans. The data were integrated with SAINT, and an empirical absorption correction with SADABS was applied.<sup>1,2</sup> The structures were solved by direct methods, using SHELXS-97 and refined using the least-squares method on  $F^2$ .<sup>3</sup> All non-H atoms were treated anisotropically. All H atoms attached to C atoms were fixed geometrically and treated as riding on their parent atoms with C-H = 0.95 Å (aromatic), 0.98 Å ( $\text{CH}_3$ ), 0.99 Å ( $\text{CH}_2$ ) or 1.0 Å (CH) with  $U_{\text{iso}}(\text{H}) = 1.2U_{\text{eq}}(\text{CH}, \text{CH}_2)$  or  $U_{\text{iso}}(\text{H}) = 1.5U_{\text{eq}}(\text{CH}_3)$ .

Crystallographic data (excluding structure factors) have been deposited with the Cambridge Crystallographic Data Centre as supplementary publication no. CCDC-936754 (**4**) and CCDC-936755 (**8**). These data can be obtained free of charge via [www.ccdc.cam.ac.uk/conts/retrieving.html](http://www.ccdc.cam.ac.uk/conts/retrieving.html) (or from the CCDC, 12 Union Road, Cambridge CB2 1EZ, UK; fax: (+44) 1223-336-033; or [deposit@ccdc.cam.ac.uk](mailto:deposit@ccdc.cam.ac.uk)).

<sup>1</sup> SAINT-NT; Bruker AXS Inc.:Madison, Wisconsin, 2000.

<sup>2</sup> SADABS, Program for data correction, Bruker-AXS.

<sup>3</sup> SHELXL-97, Program for Crystal Structure Refinement, G. M. Sheldrick, University of Göttingen, Acta Crystallogr., Sect.A **2008**, *64*, 112-12.

### Selected crystal data

**4** (CCDC-936754):  $C_{74}H_{48}N_2$ ,  $M = 965.14$ , Monoclinic, space group  $P2(1)/c$ ,  $a = 9.095(2) \text{ \AA}$ ,  $b = 26.610(7) \text{ \AA}$ ,  $c = 11.307(3) \text{ \AA}$ ,  $V = 2565.3(12) \text{ \AA}^3$ ,  $Z = 2$ , crystal size  $0.26 \times 0.20 \times 0.02 \text{ mm}^3$ , 41058 reflections collected (5197 independent,  $R_{\text{int}} = 0.1136$ ), 344 parameters, 0 restraints,  $R1[I > 2\sigma(I)] = 0.0596$ ,  $wR2 [\text{all data}] = 0.1572$ , largest diff. peak and hole: 0.287 and  $-0.204 \text{ e.\AA}^{-3}$ . Detail of the molecular view shown in Fig. 2:

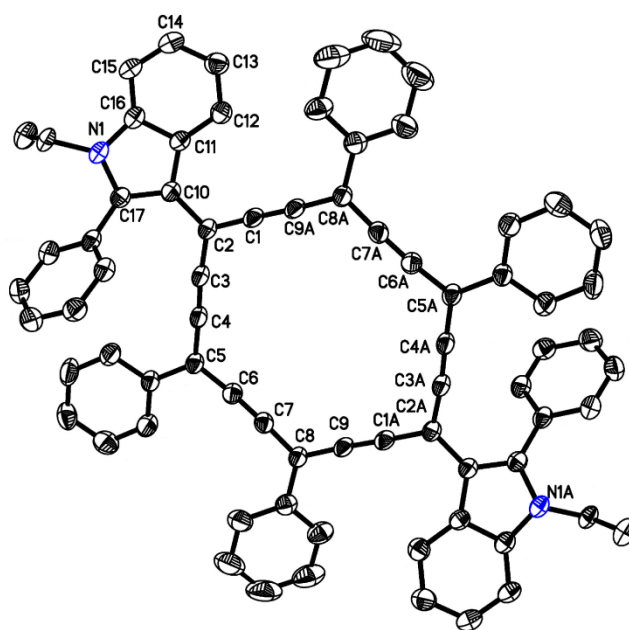

**8** (CCDC-936755):  $C_{79.50}H_{51.50}C_{16.50}N_2$ ,  $M = 1265.15$ , Triclinic, space group  $P-1$ ,  $a = 12.939(6) \text{ \AA}$ ,  $b = 15.040(7) \text{ \AA}$ ,  $c = 18.094(8) \text{ \AA}$ ,  $V = 3301(3) \text{ \AA}^3$ ,  $Z = 2$ , crystal size  $0.22 \times 0.03 \times 0.02 \text{ mm}^3$ , 63465 reflections collected (10737,  $R_{\text{int}} = 0.1520$ ), 887 parameters, 157 restraints,  $R1[I > 2\sigma(I)] = 0.0884$ ,  $wR2 [\text{all data}] = 0.2965$ , largest diff. peak and hole: 0.809 and  $-0.373 \text{ e.\AA}^{-3}$ . Molecular view of **8**: see Fig. 3.



## Selected NMR data

### Full $^1\text{H}$ NMR spectrum of **8**:

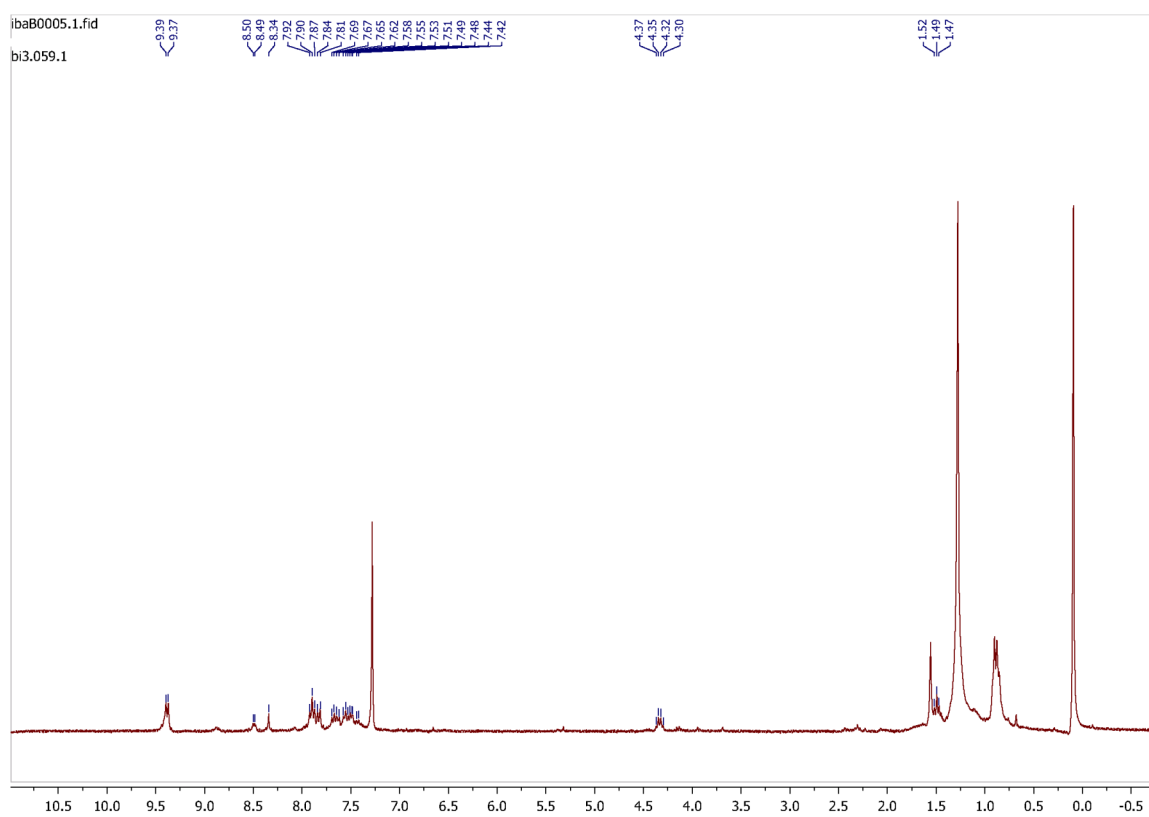

### Global view of the aromatic region in the ROESY spectrum of **8**:

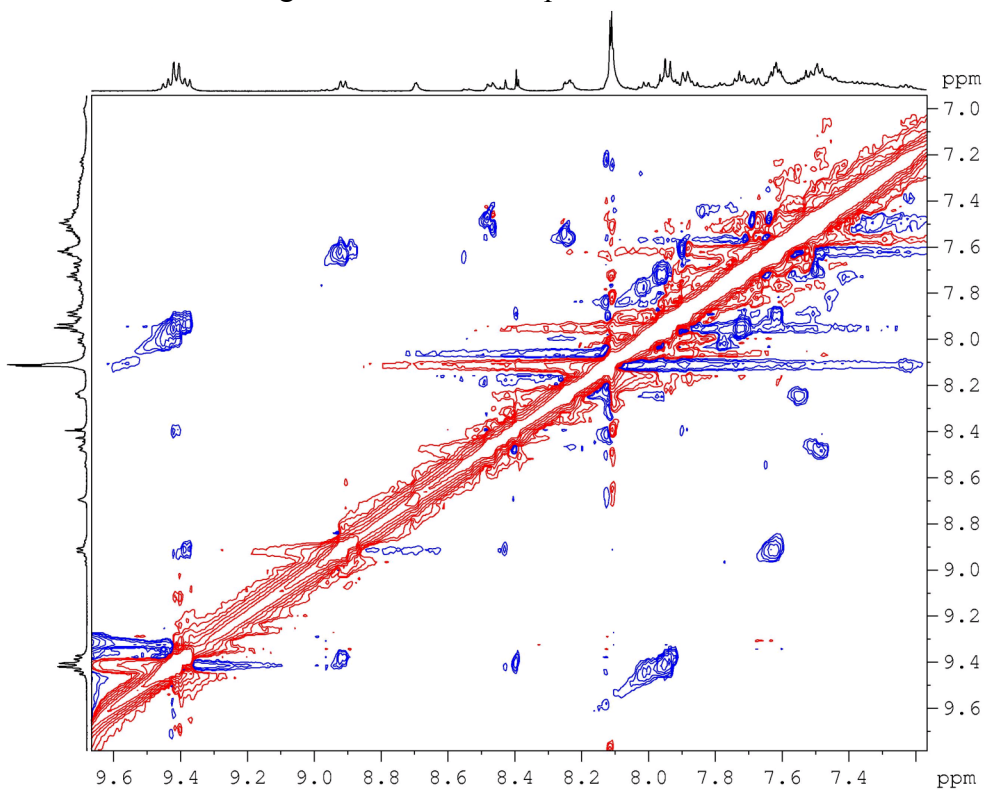

Detail of the ROESY spectrum of 8: correlation between the ethylenic protons at 8.39 ppm and the *ortho* protons of the phenyl substituents of the macrocycle at 9.41 ppm:

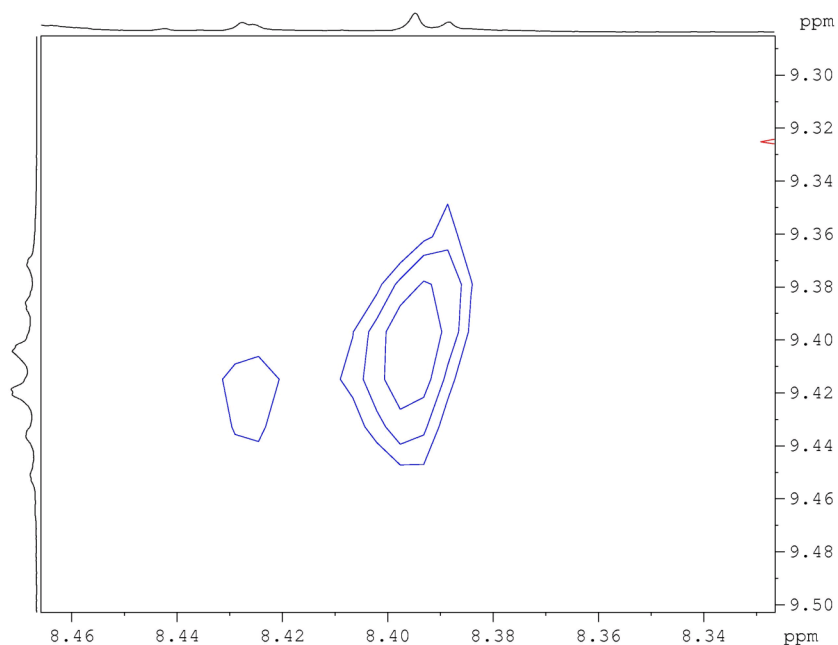

Detail of the ROESY spectrum of 8: correlation between the ethylenic protons at 8.39 ppm and the *ortho* protons of the phenyl substituent at the C<sub>2</sub> position of the indole at 7.89 ppm:

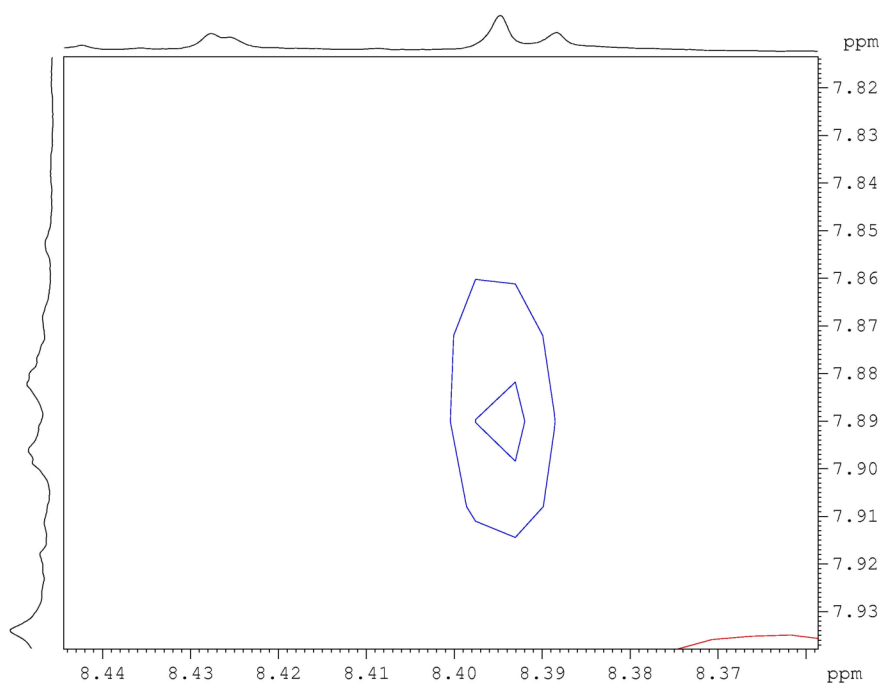

Full  $^1\text{H}$  NMR spectrum of **9**:

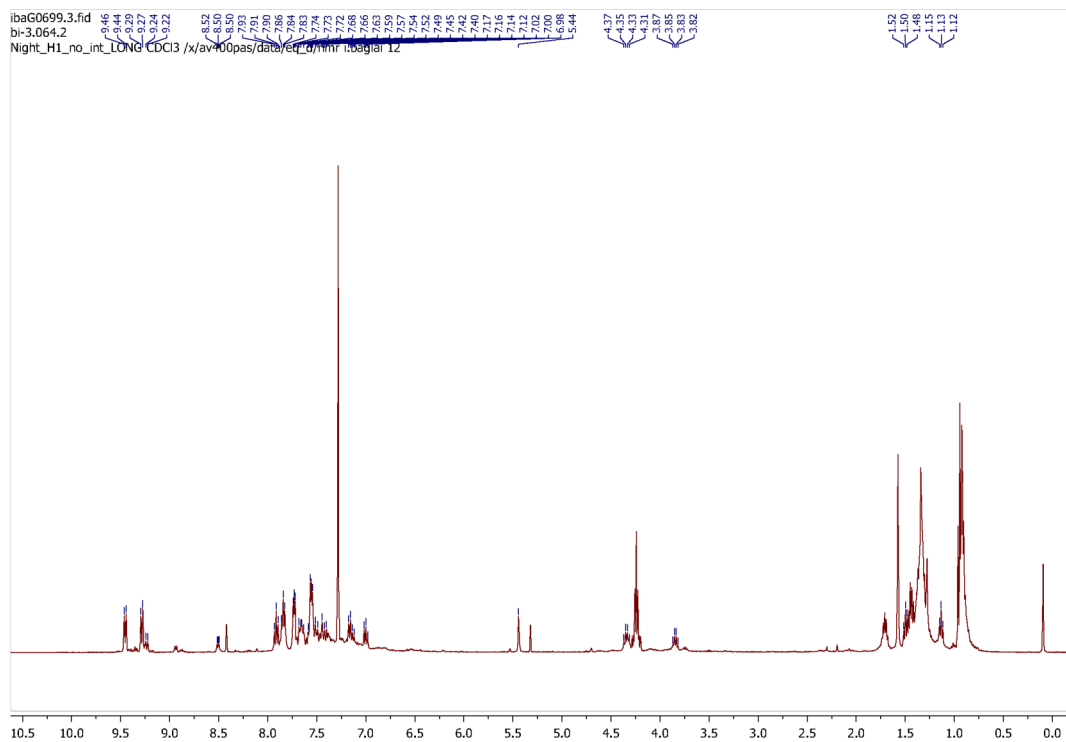

Global view of the aromatic region in the ROESY spectrum of **9**:

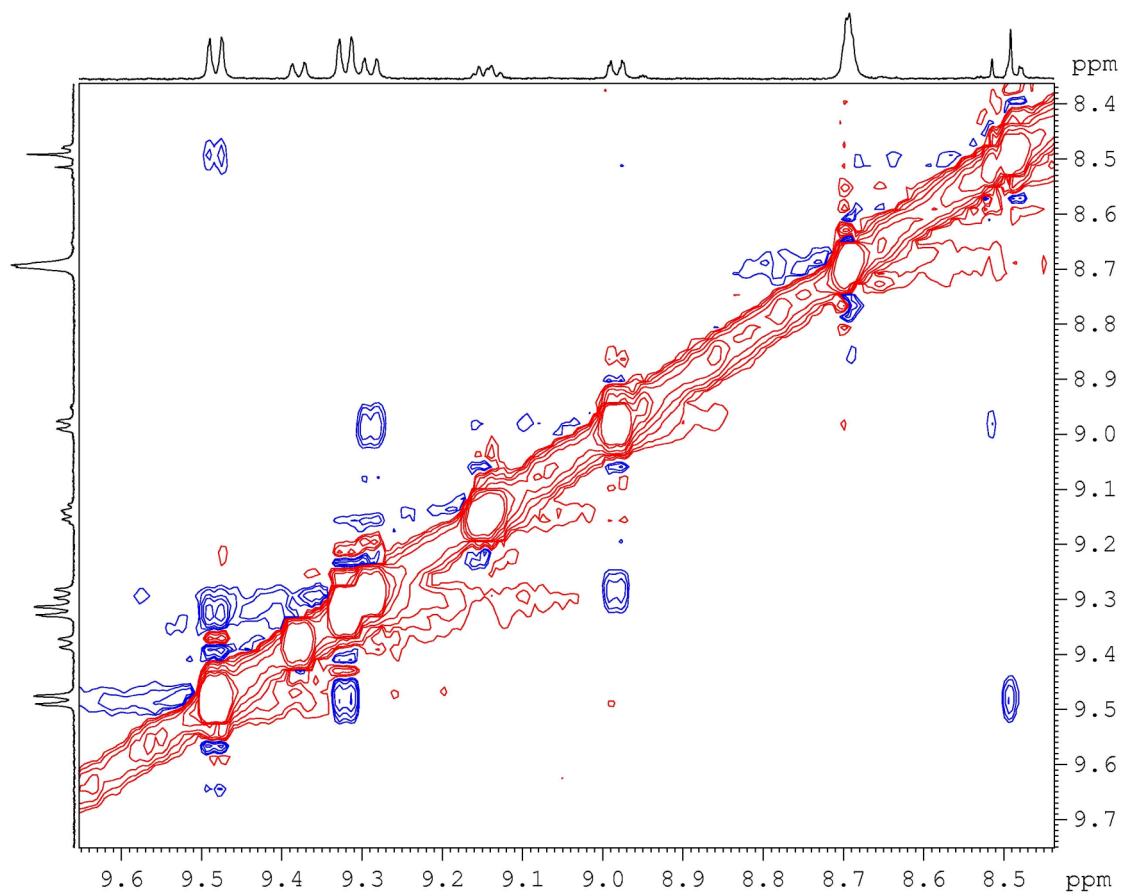

Detail of the ROESY spectrum of 9: correlation between the ethylenic protons at 8.48 ppm and the *ortho* protons of the phenyl substituents of the macrocycle at 9.48 ppm:

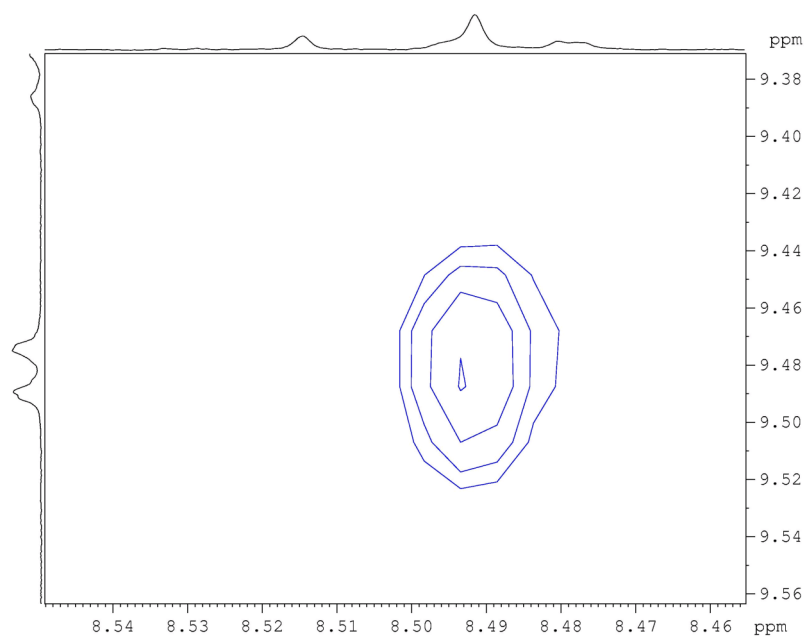

Detail of the ROESY spectrum of 9: correlation between the ethylenic protons at 8.48 ppm and the *ortho* protons of the phenyl substituent at the C<sub>2</sub> position of the indole at 7.89 ppm:

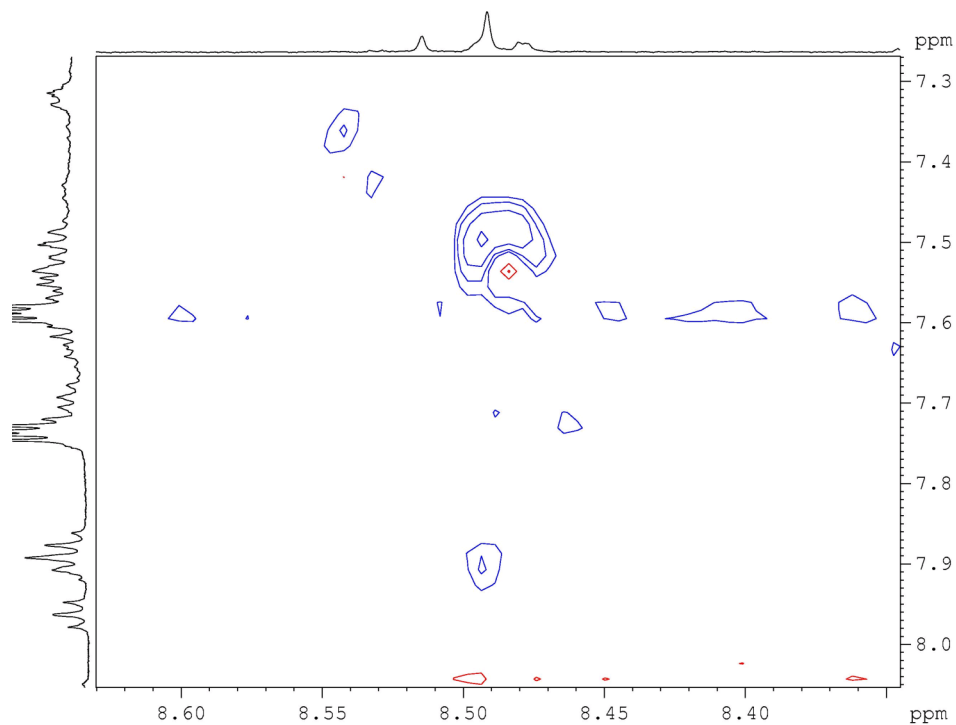

Detail of the ROESY spectrum of 9: correlation between the  $CH_2-C=O$  at 5.44 ppm and the *ortho* protons of the phenyl substituent at the  $C_2$  position of the other indole at 7.32 ppm:

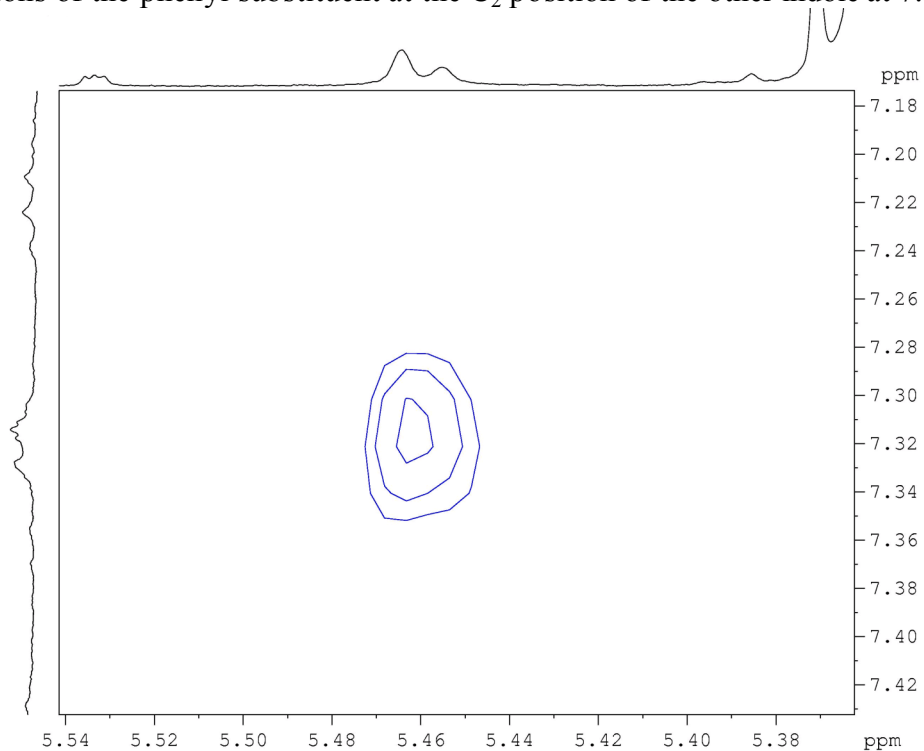

Detail of the ROESY spectrum of 9: correlation between the  $CH_2-C=O$  at 5.44 ppm and the *ortho* protons of the phenyl substituents of the macrocycle at 9.32 ppm:

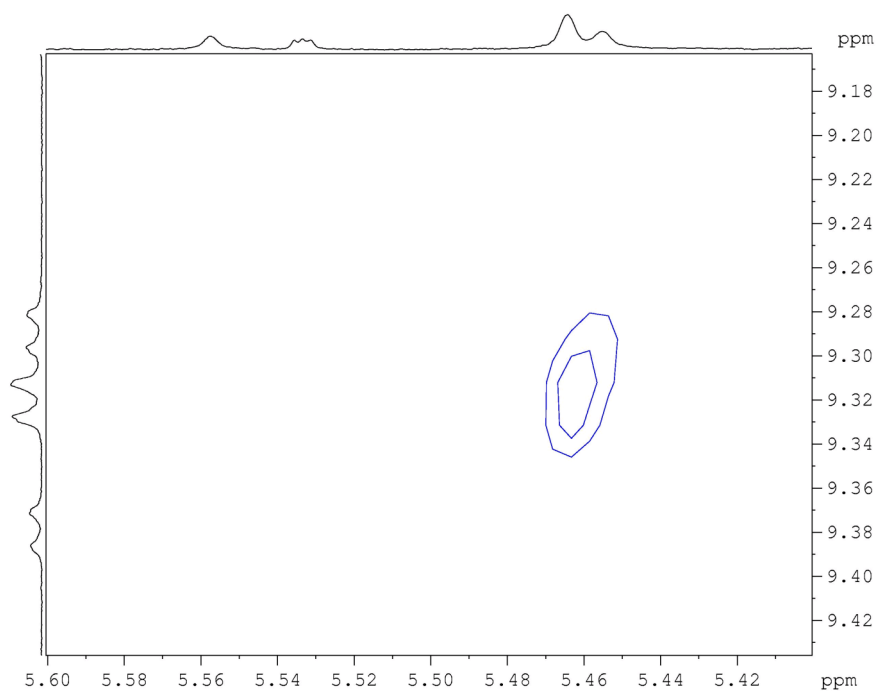

Full  $^1\text{H}$  NMR spectrum of **10**:

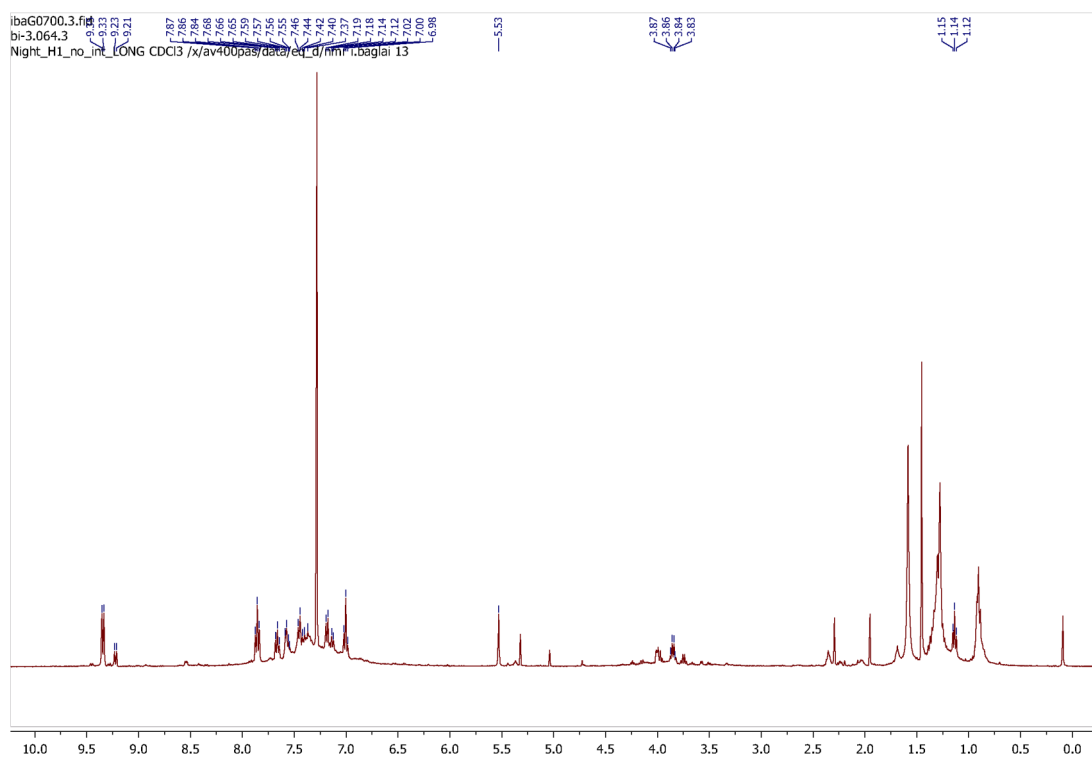

Global view of the aromatic region in the ROESY spectrum of **10**:

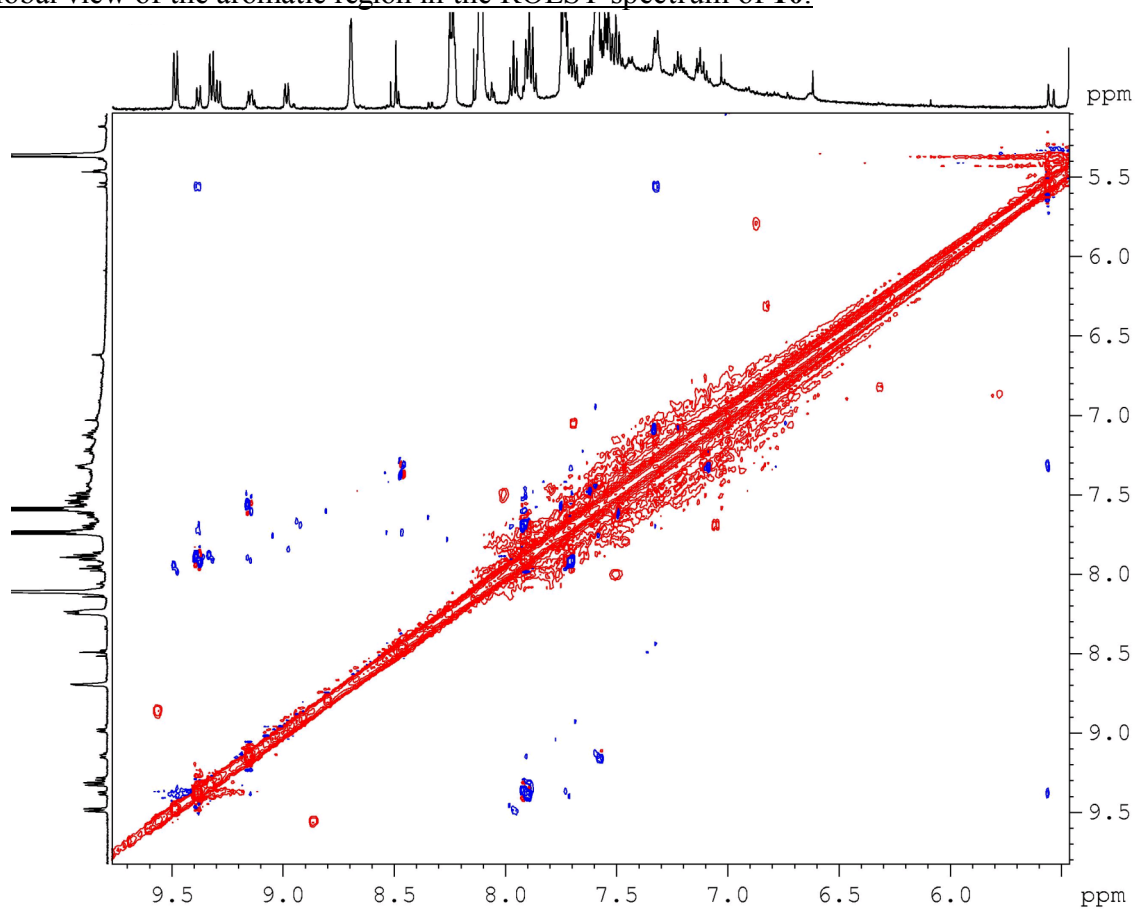

Detail of the ROESY spectrum of **10**: correlation between the  $\text{CH}_2\text{-C=O}$  at 5.56 ppm and the *ortho* protons of the phenyl substituents of the macrocycle at 9.38 ppm:

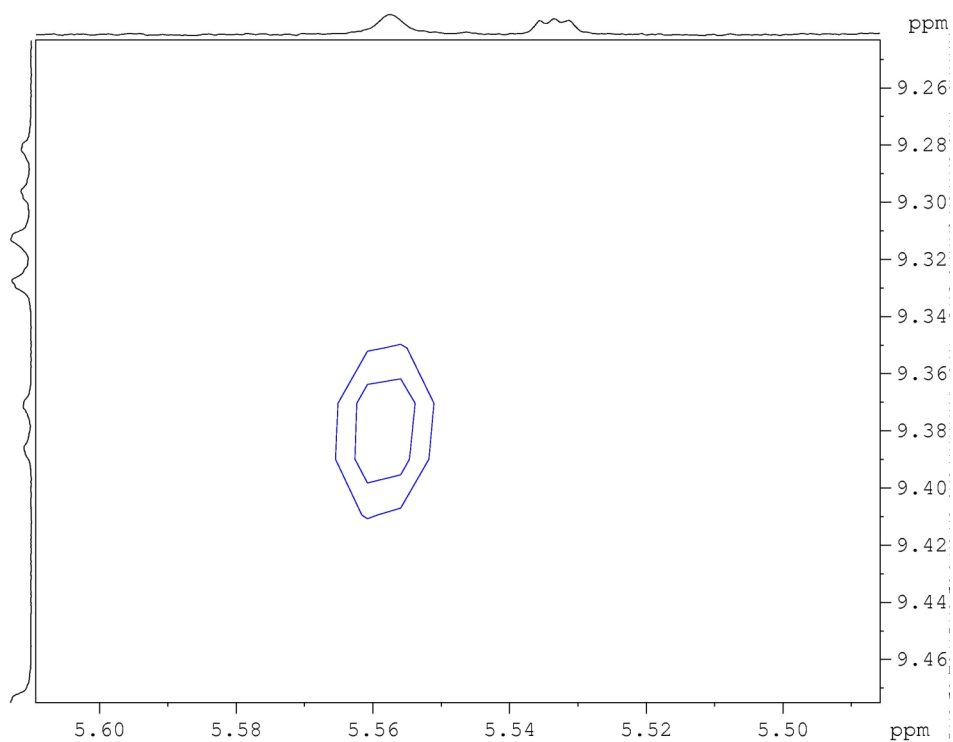

Detail of the ROESY spectrum of **10**: correlation between the  $\text{CH}_2\text{-C=O}$  at 5.56 ppm and the *ortho* protons of the phenyl substituent at the  $\text{C}_2$  position of the other indole at 7.32 ppm:

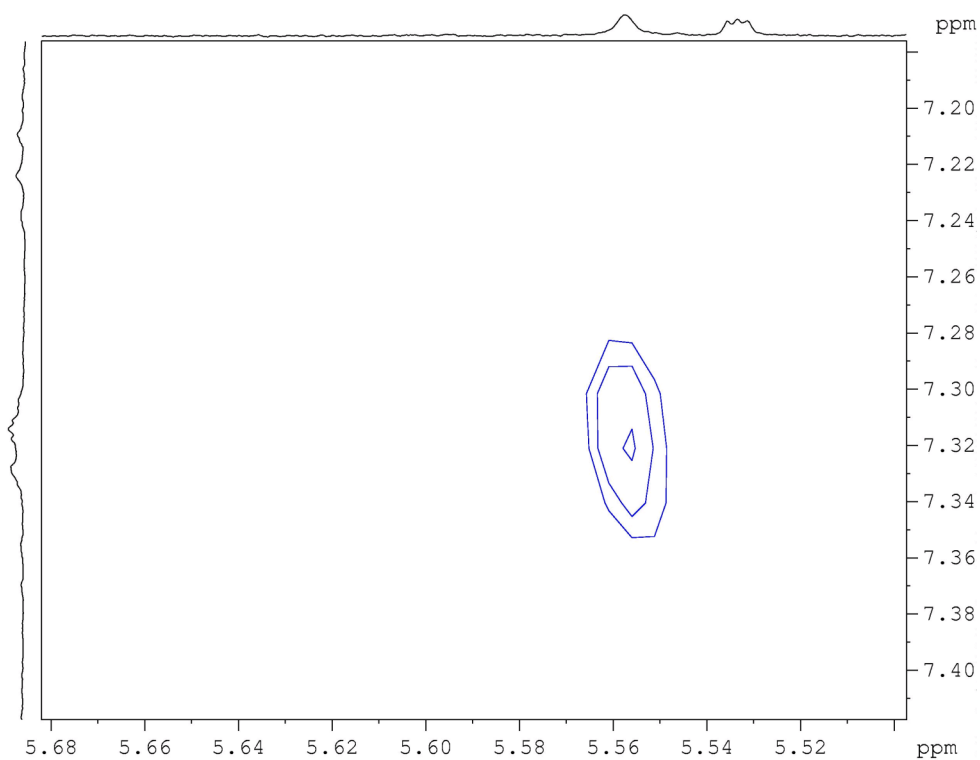

Supplement: c3cc43204a.pdf [file c3cc43204a.pdf]
